# Supplementary material for: Ocean Modeling with Adaptive REsolution (OMARE; version 1.0) – refactoring the NEMO model (version 4.0.1) with the parallel computing framework of JASMIN – Part 1: Adaptive grid refinement in an idealized double-gyre case
Source: Copernicus journal article supplement (doi:10.5194/gmd-16-679-2023), 2023-01-30
Supplement: Supplementary file 2 [file gmd-16-679-2023-supplement.zip]

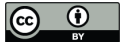

## *Supplement of*

# **Ocean Modeling with Adaptive REsolution (OMARE; version 1.0) – refactoring the NEMO model (version 4.0.1) with the parallel computing framework of JASMIN – Part 1: Adaptive grid refinement in an idealized double-gyre case**

**Yan Zhang et al.**

*Correspondence to:* Shiming Xu ([xusm@tsinghua.edu.cn](mailto:xusm@tsinghua.edu.cn)) and Hengbin An ([an\\_hengbin@iapcm.ac.cn](mailto:an_hengbin@iapcm.ac.cn))

- [gmd-16-679-2023-supplement-title-page.pdf](#)
- [supplementary\\_files](#)
  - [.DS\\_Store](#)
  - [1\\_0.5-deg\\_0.1-deg.mp4](#)
  - [2\\_eke\\_L-M.pdf](#)
  - [3\\_0.1-deg\\_0.02-deg\\_winter.mp4](#)
  - [4\\_0.1-deg\\_0.02-deg\\_summer.mp4](#)
  - [5\\_manual\\_JASMIN-OMARE.pdf](#)
  - [README.txt](#)

The copyright of individual parts of the supplement might differ from the article licence.
