# Supplementary material for: Ocean Modeling with Adaptive REsolution (OMARE; version 1.0) – refactoring the NEMO model (version 4.0.1) with the parallel computing framework of JASMIN – Part 1: Adaptive grid refinement in an idealized double-gyre case
Source: Copernicus journal article supplement (doi:10.5194/gmd-16-679-2023), 2023-01-30
Supplement: Supplementary file 3 [file gmd-16-679-2023-supplement.zip]

Archive with 9 entries (8 files):
- supplementary_files/
- supplementary_files/.DS_Store
- supplementary_files/2_eke_L-M.pdf
- supplementary_files/5_manual_JASMIN-OMARE.pdf
- supplementary_files/3_0.1-deg_0.02-deg_winter.mp4
- supplementary_files/1_0.5-deg_0.1-deg.mp4
- supplementary_files/README.txt
- supplementary_files/4_0.1-deg_0.02-deg_summer.mp4
- gmd-16-679-2023-supplement-title-page.pdf
