# Supplementary material for: Ocean Modeling with Adaptive REsolution (OMARE; version 1.0) – refactoring the NEMO model (version 4.0.1) with the parallel computing framework of JASMIN – Part 1: Adaptive grid refinement in an idealized double-gyre case
Source: Copernicus journal article supplement (doi:10.5194/gmd-16-679-2023), 2023-01-30
Supplement: Supplementary file 3 [file gmd-16-679-2023-supplement.zip › supplementary_files/README.txt]

The supplementary files are provided, including 3 movie supplementary files and a manual for installing JASMIN and compiling/running OMARE. The movies are for the following experiments:

Filename                         Experiment
1_0.5-deg_0.1-deg.mp4            Half-year full-field 0.5-deg (top), two regional refinement to 0.1-deg (second & third row), and full-field 0.1-deg (bottom row)
2_eke_L-M.pdf                    Annual mean eddy kinetic energy (in m2/s2) for 0.1-deg simulation based on daily instantaneous model status.
3_0.1-deg_0.02-deg_winter.mp4    Wintertime (50-day) full-field 0.1-deg (top), two AMR experiment to 0.02-deg (second & third row), and full-field 0.02-deg (bottom row)
4_0.1-deg_0.02-deg_summer.mp4    Summertime (50-day) full-field 0.1-deg (top), two AMR experiment to 0.02-deg (second & third row), and full-field 0.02-deg (bottom row)

In all animations, we show sea surface height fields on left panels, and surface Rossby number (relative vorticity over f) on right panels.
All animation starts from five days BEFORE the refinement, and the black lines marking the boundaries of the fine-resolution regions.
Daily instantaneous fields are used to generate the animations. 
The corresponding date in each frame are also shown.


The filename of the usage manual is: 5_manual_JASMIN-OMARE.pdf
