# Supplementary figures and images for: Ocean Modeling with Adaptive REsolution (OMARE; version 1.0) – refactoring the NEMO model (version 4.0.1) with the parallel computing framework of JASMIN – Part 1: Adaptive grid refinement in an idealized double-gyre case
Source: Copernicus journal article supplement (doi:10.5194/gmd-16-679-2023), 2023-01-30

(a) L

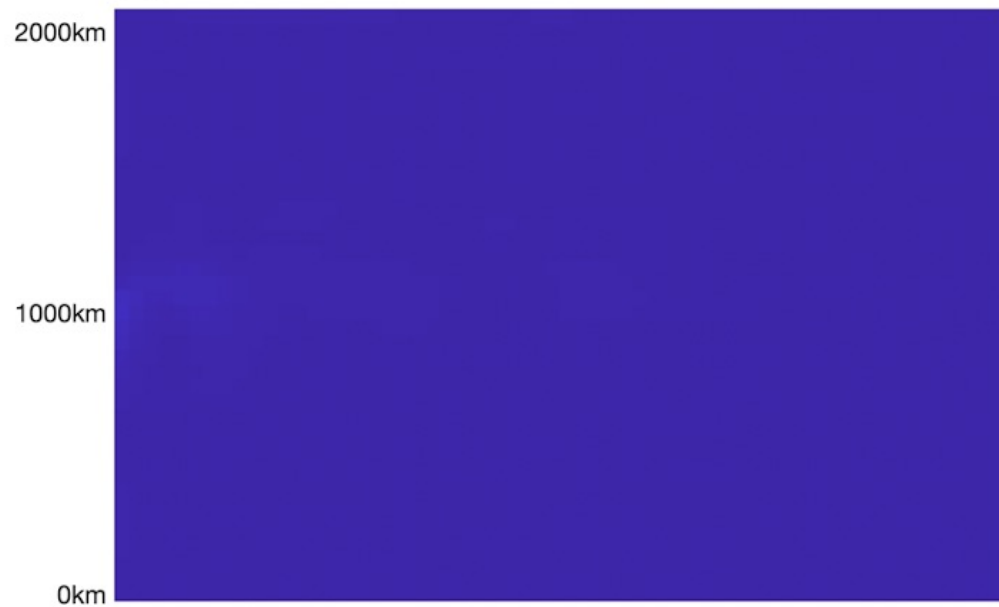

(b) M

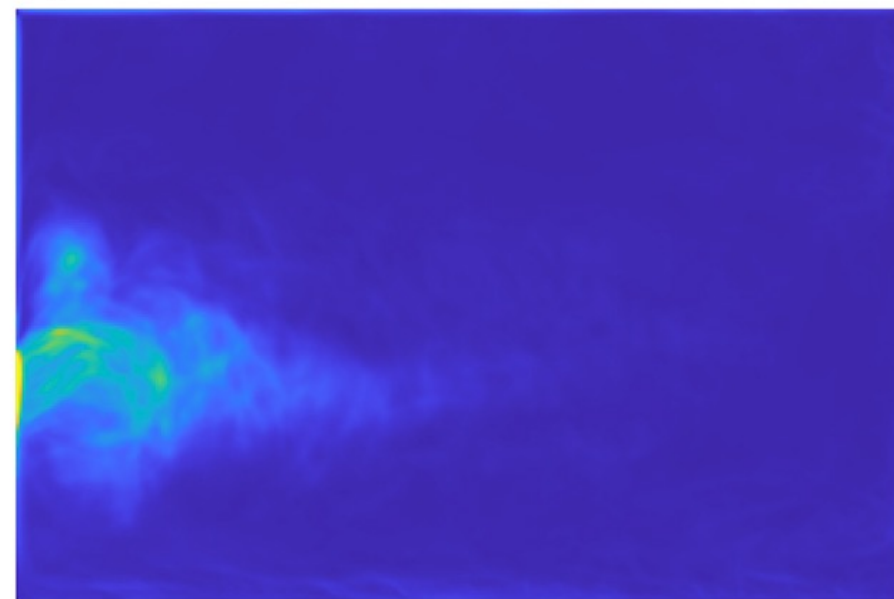

(c) L-M-I

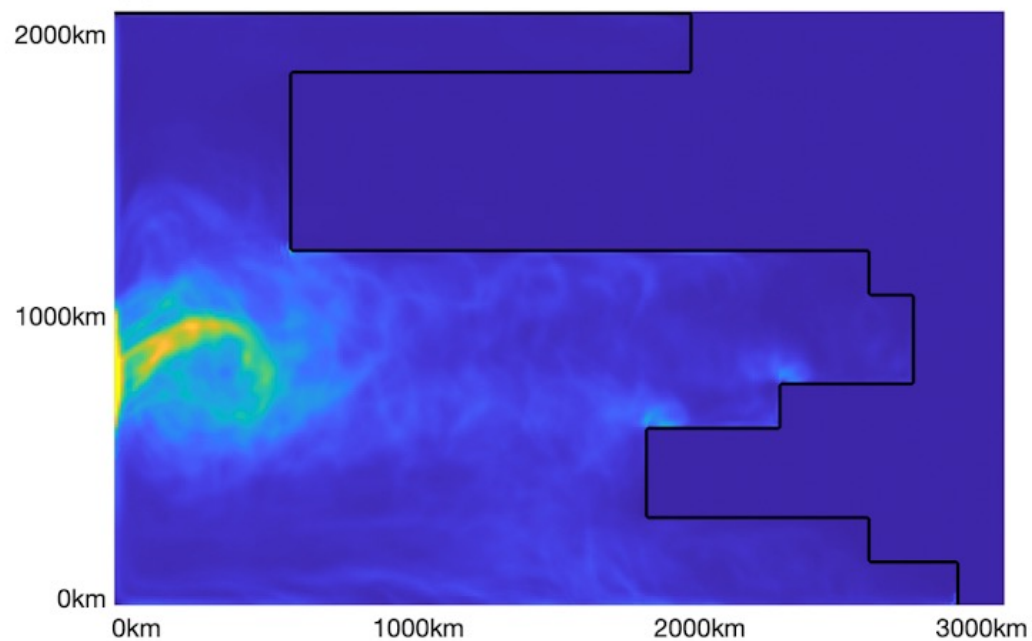

(d) L-M-II

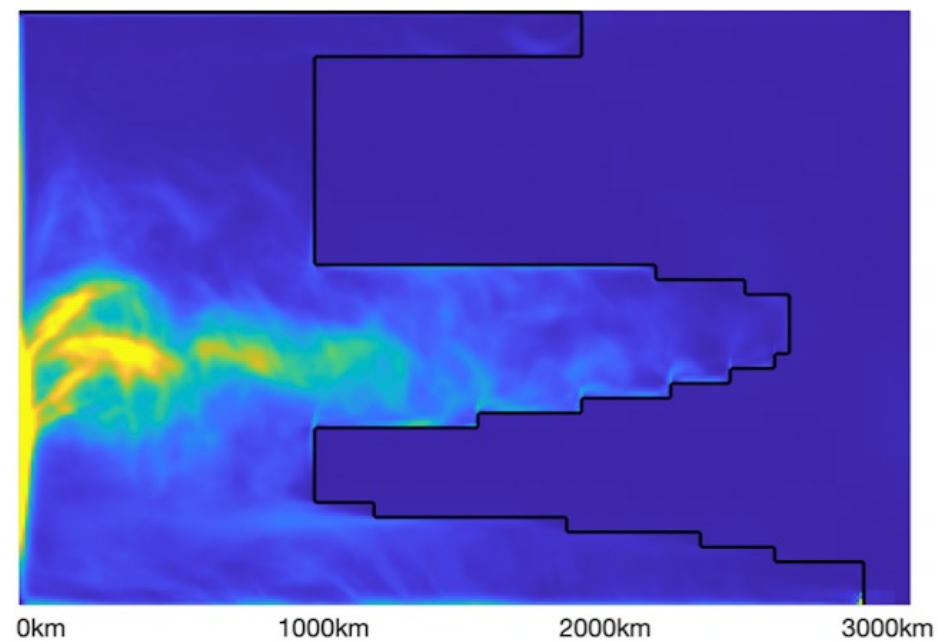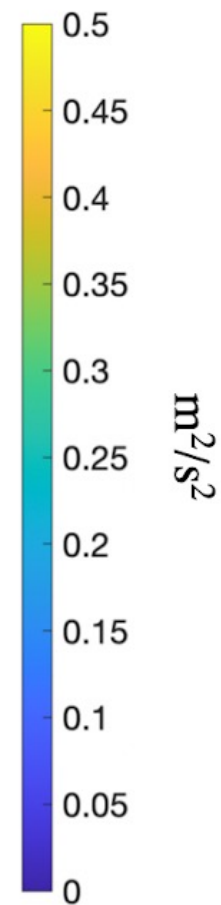

Supplement: Supplementary file 1 [file gmd-16-679-2023-supplement.zip]
